# Supplementary material
Source: PubMed Central journal article supplement (PMC2867755)
Supplement: 0914242107_pnas.200914242SI.pdf [file 0914242107_pnas.200914242SI.pdf]

# Supporting Information

Kumar et al. 10.1073/pnas.0914242107

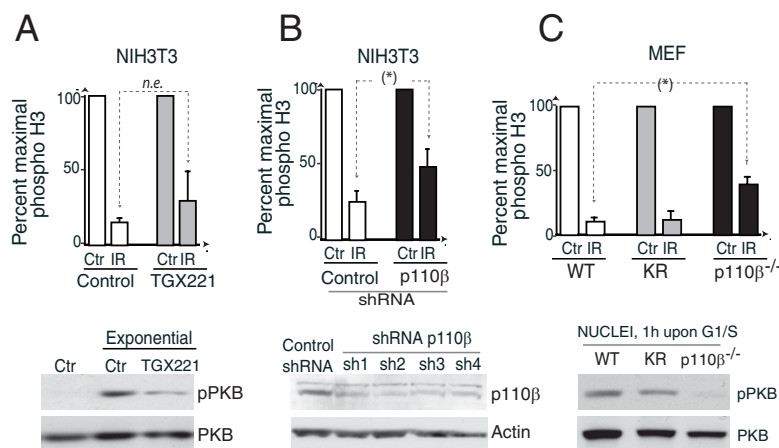

**Fig. S1.** p110 $\beta$  deletion impairs G2/M checkpoint. (A) NIH 3T3 cells were arrested at the G1/S border by double-Thi block and released. At 5 h after release, cells were treated with TGX221 (30  $\mu$ M, 1 h), and at 6 h samples were irradiated (IR, 5 Gy). The proportion of mitotic cells was analyzed by p-histone H3<sup>+</sup> staining at 12 h after release. The graph shows the fraction (mean  $\pm$  SD,  $n = 3$ ) of p-histone H3<sup>+</sup> cells in each condition compared to maximum (~45% p-H3<sup>+</sup> cells in nonirradiated controls, considered 100). To control inhibitor activity, we examined extracts from exponentially growing NIH 3T3 cells alone or preincubated with TGX221 (30  $\mu$ M, 1 h) by Western blot using phospho-PKB Ab. (B) NIH 3T3 cells transfected with p110 $\beta$  shRNA (shRNA4, 48 h) or (C) p110 $\beta$ <sup>-/-</sup> immortalized murine embryonic fibroblasts (MEF), some reconstituted with WT or kinase-dead (KR) p110 $\beta$ , were treated as in A. Maximum p-histone H3<sup>+</sup> cells was ~15% in control NIH 3T3 G2/M cells and ~10% in control G2/M MEF. In B, to control shRNA efficiency, extracts from NIH 3T3 transfected with four different sets of p110 $\beta$  shRNA (48 h) were examined by Western blot. All four p110 $\beta$  shRNAs induced a similar defect in G2 arrest. In C, to control PI3K pathway status in MEF, we examined extracts from S phase cells by Western blot using phospho-PKB. \*,  $P < 0.05$ .

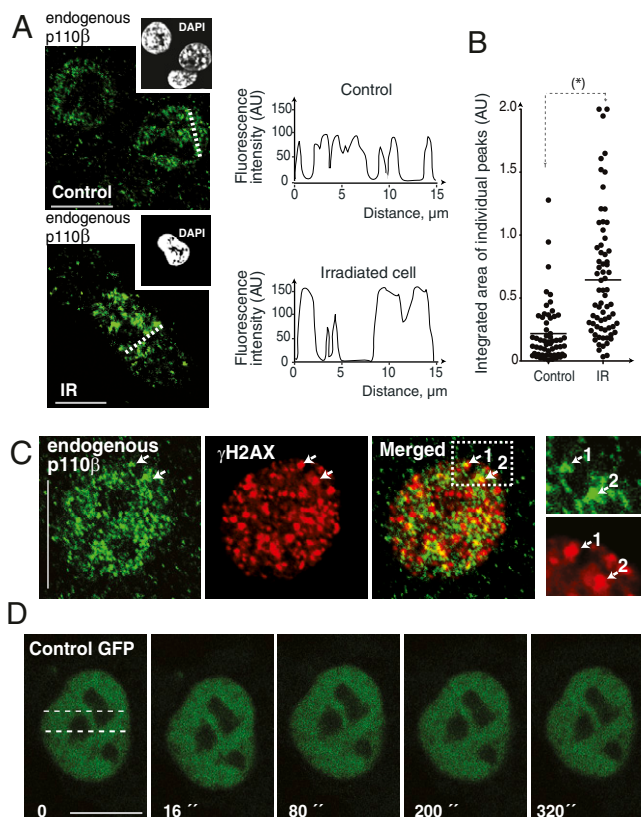

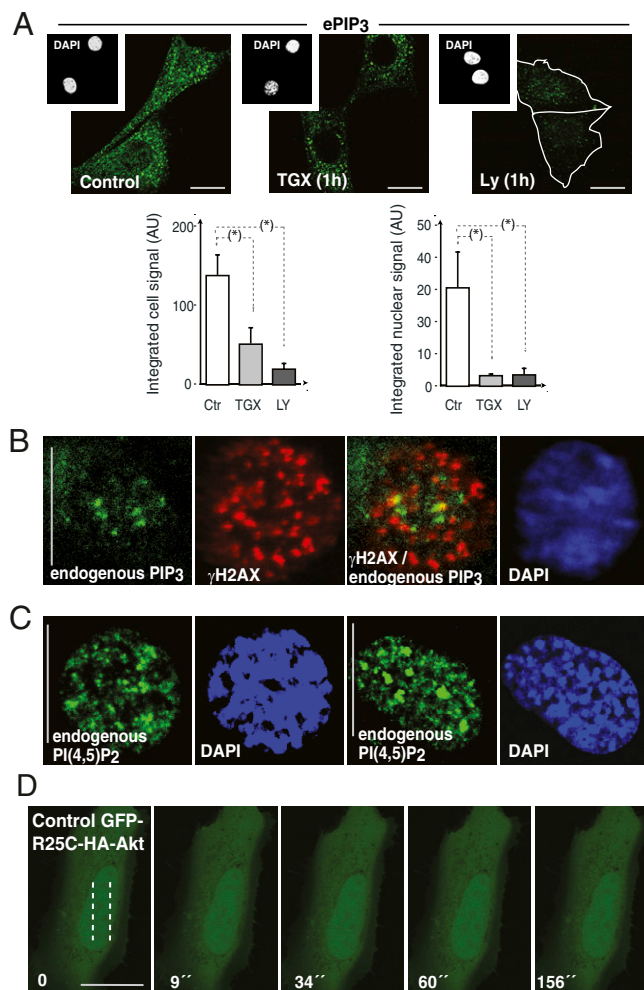

**Fig. S3.** Endogenous PIP<sub>3</sub> localizes in DSB foci. (A) Exponentially grown NIH 3T3 alone or pretreated (1 h) with TGX221 or Ly294002 were stained by IF using anti-PIP<sub>3</sub> Ab. Insets show DAPI staining. The graphs illustrate the integrated signal from the entire cell or from the nucleus (indicated). (\*),  $P < 0.05$ . (B) NIH 3T3 cells were irradiated (IR, 5 Gy); after 30 min, PIP<sub>3</sub> (green),  $\gamma$ H2AX (red), and DNA (DAPI) were examined by IF. (C) NIH 3T3 cells were irradiated (IR, 5 Gy); after 30 min, PIP<sub>2</sub> (green) and DNA (DAPI) were examined by IF. (D) NIH 3T3 cells expressing the R25C mutant of the Akt PH domain were microirradiated with an UV laser and we examined real-time translocation of the probe to the laser path (dotted lines). (Scale bars in A–D, 15  $\mu$ m.)

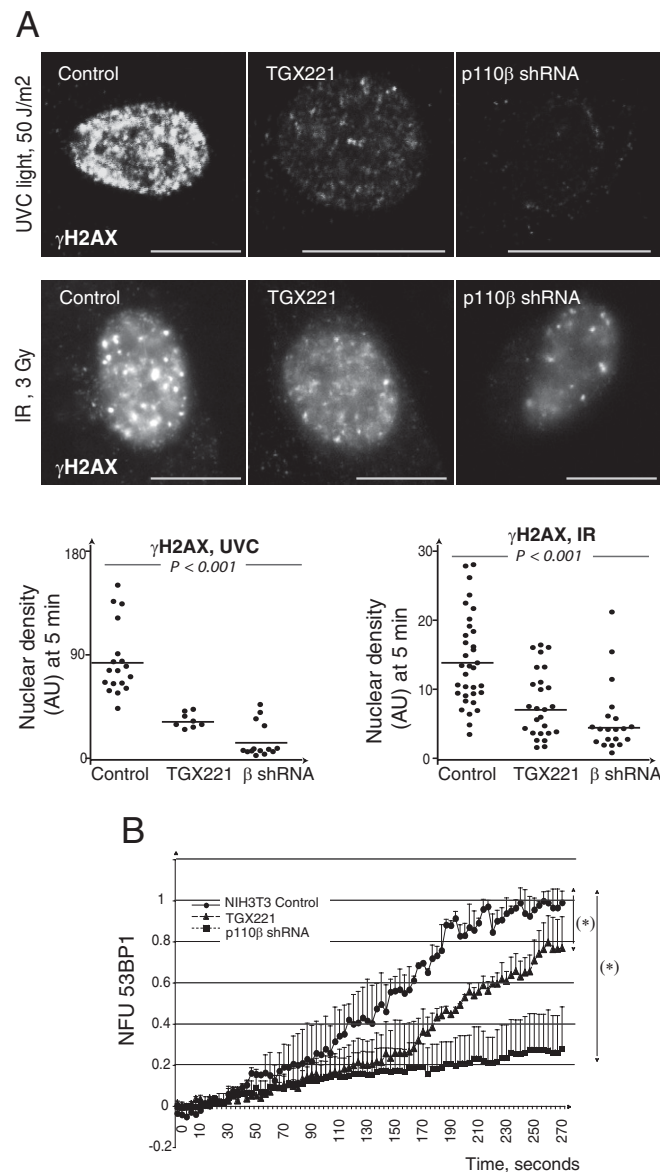

**Fig. S4.** Defective phospho- $\gamma$ H2AX and 53BP1 focus assembly in irradiated p110 $\beta$ -deficient cells. (A) NIH 3T3 cells were transfected with p110 $\beta$  or control shRNA (48 h); the latter cells were treated with TGX221 (30  $\mu$ M) or DMSO (4 h). Cells were exposed to IR or UVC, and processed (5 min later) for indirect IF using antiphospho- $\gamma$ H2AX Ab. The graphs represent the integrated nuclear fluorescence intensity for a representative set of cells ( $n = 20$ ) of  $> 100$  examined. (Scale bar = 15  $\mu$ m.) Unpaired  $\chi^2$   $P$  values indicated. (B) NIH 3T3 cells were transfected with p110 $\beta$  or control shRNA (48 h) in combination with GFP-53BP1 (24 h); other cells were transfected with GFP-53BP1 (24 h) and treated with TGX221 (4 h). Cells were microirradiated with an UV laser. Normalized fluorescence units (NFU) along laser tracks was calculated and plotted as a function of time. The assembly curves represent mean  $\pm$  SD ( $n = 6$ ). (\*),  $P < 0.05$ .

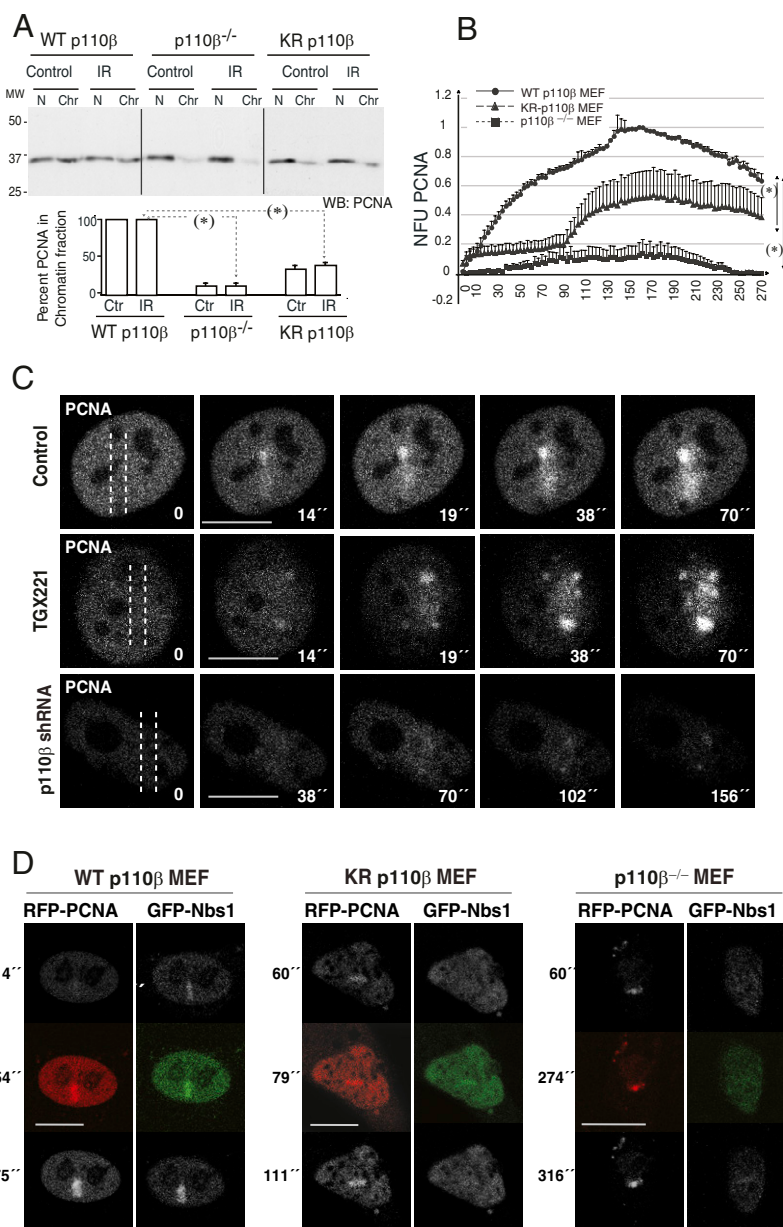

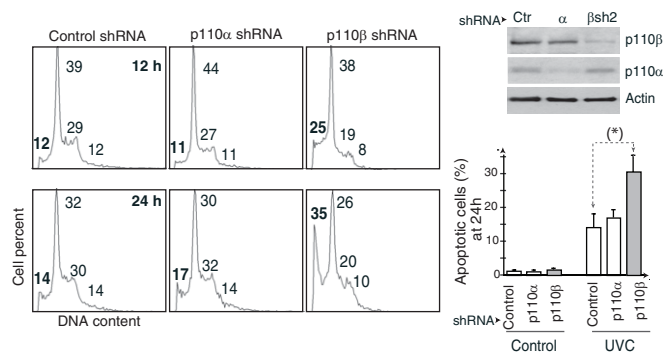

**Fig. S6.** p110 $\beta$  deletion induces radiation sensitivity. NIH 3T3 cells were transfected with p110 $\beta$  or p110 $\alpha$ -specific shRNA (48 h). p110 $\alpha$  and p110 $\beta$  expression levels were examined by Western blot. Cell-cycle profiles in control or p110 $\alpha$ - and p110 $\beta$ -shRNA-transfected cells were examined by flow cytometry at different times post-UVC exposure (80 J/m<sup>2</sup>). The percentage of cells with sub-G1, G0/G1, S, or G2/M DNA are indicated. The graph shows the percentage of cells with a sub-G1 DNA content 24h upon IR (mean  $\pm$  SD,  $n$  = 5). (\*),  $P$  < 0.05.

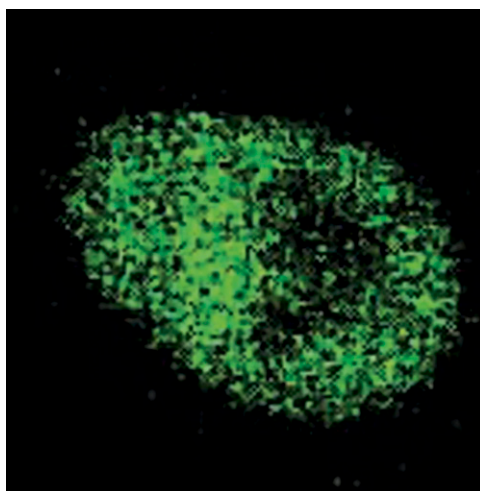

**Movie S1.** A representative NIH 3T3 cell expressing GFP-p110 $\beta$ ; the video includes 89 frames taken every 3.2 s after laser irradiation.

Movie S1

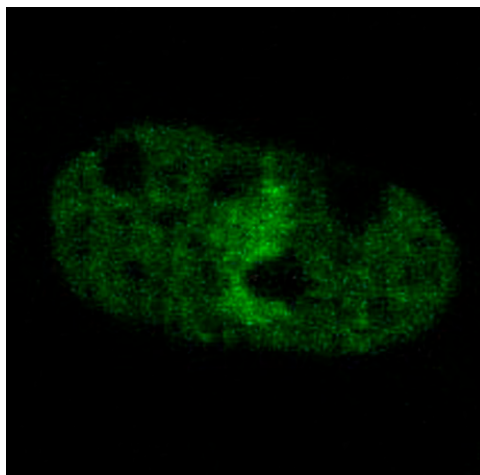

**Movie S2.** Three concatenated movies of NIH 3T3 cells expressing GFP-53BP1: a representative laser-irradiated NIH 3T3 cell (first cell), a NIH 3T3 cell pretreated with TGX221 (second cell), and a NIH 3T3 cell transfected (48 h before irradiation) with p110 $\beta$  shRNA (third cell). For recording, frames were taken every 3.2 s after laser irradiation.

[Movie S2](#)

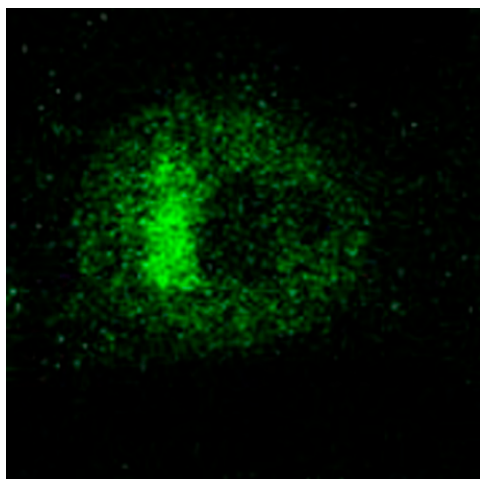

**Movie S3.** Concatenated movies of representative laser-irradiated MEF expressing GFP-Nbs1 recorded every 3.2 s. The movie includes a representative MEF expressing WT-p110 $\beta$  (first), a KR-p110 $\beta$  reconstituted p110 $\beta^{-/-}$  MEF (second), and a p110 $\beta^{-/-}$  MEF (third).

[Movie S3](#)

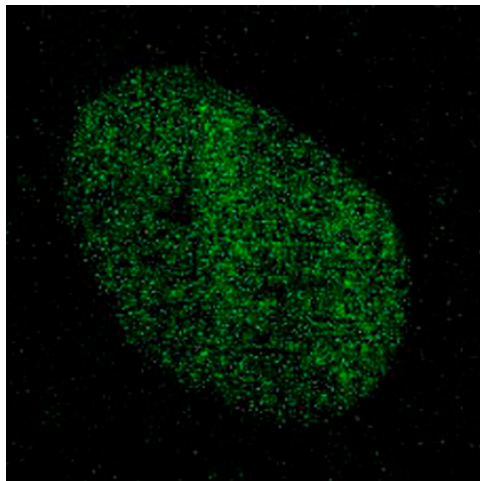

**Movie S4.** Concatenated movies of representative U2OS cells expressing WT or mutated GFP-hNbs1 upon laser irradiation (recorded every 3.2 s). Cells were transfected with WT-GFP-hNbs1 (first), GFP-A<sub>4</sub><sup>653</sup>-hNbs1 (second), or GFP-A<sub>3</sub><sup>670</sup>-hNbs1 (third).

[Movie S4](#)

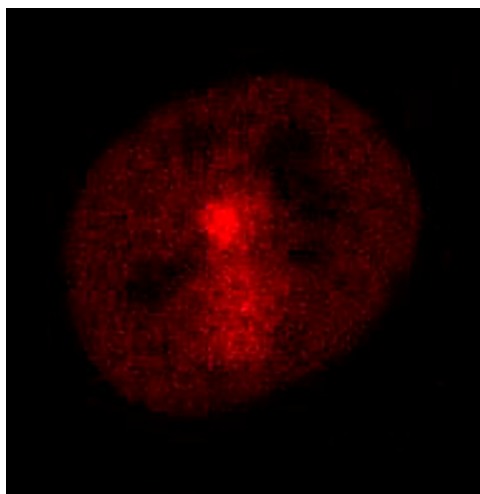

**Movie S5.** Representative RFC-PCNA-expressing NIH 3T3 cells microirradiated with an UV laser and recorded (first cell), or pretreated with TGX221 (1 h) before irradiation (second cell), or transfected (48 h before irradiation) with p110 $\beta$  shRNA (third cell, concatenated movies). The videos include ~50 frames taken every 3.2 s after irradiation.

[Movie S5](#)

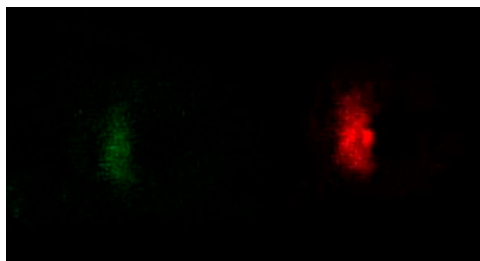

**Movie S6.** With Movie S7, a simultaneous analysis of GFP-Nbs1 (green) and RFP-PCNA (red) concentration at laser irradiated tracks in p110 $\beta$ <sup>-/-</sup> MEF reconstituted with WT-p110 $\beta$  (first cell) or KR-p110 $\beta$  (second cell, concatenated movies). Video starts immediately after laser irradiation; frames were recorded every 3.2 seconds. The video was mounted with half of the Nbs1-GFP frames (every 6.4 s) and half of the RFP-PCNA frames (every 6.4 s).

#### [Movie S6](#)

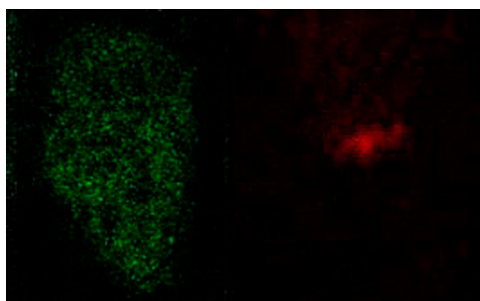

**Movie S7.** A typical p110 $\beta$ <sup>-/-</sup> MEF examined similarly to that shown in Movie S6. Video starts immediately after laser irradiation; frames were recorded every 3.2 seconds. The video was mounted with half of the Nbs1-GFP frames (every 6.4 s) and half of the RFP-PCNA frames (every 6.4 s).

#### [Movie S7](#)
